# Supplementary material for: Synthesis and surface functionalization of gold microtubes for SERS detection of dyes
Source: Royal Society of Chemistry journal article supplement (doi:10.1039/d6ra01224h), 2026-04-29
Supplement: d6ra01224h1.zip [file Au.pdf › Data/XRD Au, Au+MUA 11/Au.pdf]

PDF Card No.: 00-004-0784 QM: S

|                                                                                                                                                                                                                                                                                                                                                                                                                                                                                                                                  |                                                                             |                          |      |                                           |         |           |
|----------------------------------------------------------------------------------------------------------------------------------------------------------------------------------------------------------------------------------------------------------------------------------------------------------------------------------------------------------------------------------------------------------------------------------------------------------------------------------------------------------------------------------|-----------------------------------------------------------------------------|--------------------------|------|-------------------------------------------|---------|-----------|
| Subfile name: Inorganic, Mineral, Alloy&Metal, Ceramic, Common Phase, Educational Pattern, Forensic, NBS Pattern                                                                                                                                                                                                                                                                                                                                                                                                                 |                                                                             |                          |      |                                           |         |           |
| Chemical formula:                                                                                                                                                                                                                                                                                                                                                                                                                                                                                                                |                                                                             | Au                       |      |                                           |         |           |
| Name:                                                                                                                                                                                                                                                                                                                                                                                                                                                                                                                            |                                                                             | Gold, syn                |      | I/Ic (RIR) = 0.000                        |         |           |
| Crystal system: Cubic                                                                                                                                                                                                                                                                                                                                                                                                                                                                                                            |                                                                             | Space group: 225 : Fm-3m |      | Obs.density, g/cm <sup>3</sup> : 19.30000 |         |           |
| Lattice parameters:                                                                                                                                                                                                                                                                                                                                                                                                                                                                                                              | a, Å                                                                        | = 4.07860                | b, Å | = 4.07860                                 | c, Å    | = 4.07860 |
|                                                                                                                                                                                                                                                                                                                                                                                                                                                                                                                                  | α, °                                                                        | = 90.000                 | β, ° | = 90.000                                  | γ, °    | = 90.000  |
|                                                                                                                                                                                                                                                                                                                                                                                                                                                                                                                                  | Volume, Å <sup>3</sup> = 67.847                                             |                          | Z    |                                           | = 4.000 |           |
|                                                                                                                                                                                                                                                                                                                                                                                                                                                                                                                                  | Reference : Swanson, Tatge. Natl. Bur. Stand. (U. S. ), Circ. 539I(1953)33. |                          |      |                                           |         |           |
| CAS: 7440-57-5                                                                                                                                                                                                                                                                                                                                                                                                                                                                                                                   |                                                                             |                          |      |                                           |         |           |
| Radiation: CuKa1                                                                                                                                                                                                                                                                                                                                                                                                                                                                                                                 |                                                                             | Wavelength, Å = 1.54056  |      |                                           |         |           |
| 2θ range: 20.00000 - 140.00000                                                                                                                                                                                                                                                                                                                                                                                                                                                                                                   |                                                                             |                          |      |                                           |         |           |
| Database comments: ANX: N. Analysis: Spectrographic analysis (%): Si 0.001, Ca 0.001, Ag 0.001. Melting Point: 1334.6-1336.2 K. Opaque Optical Data: Opaque mineral optical data on specimen from unspecified locality: RR2Re=71.6, Disp.=16, VHN100=53-58, Color values=.384, .391, 72.7, Ref.: IMA Commission on Ore Microscopy QDF. Sample Source or Locality: Sample purified at NBS, Gaithersburg, Maryland, USA and is about 99.997% Au. Temperature of Data Collection: 299 K. Unit Cell Data Source: Powder Diffraction. |                                                                             |                          |      |                                           |         |           |

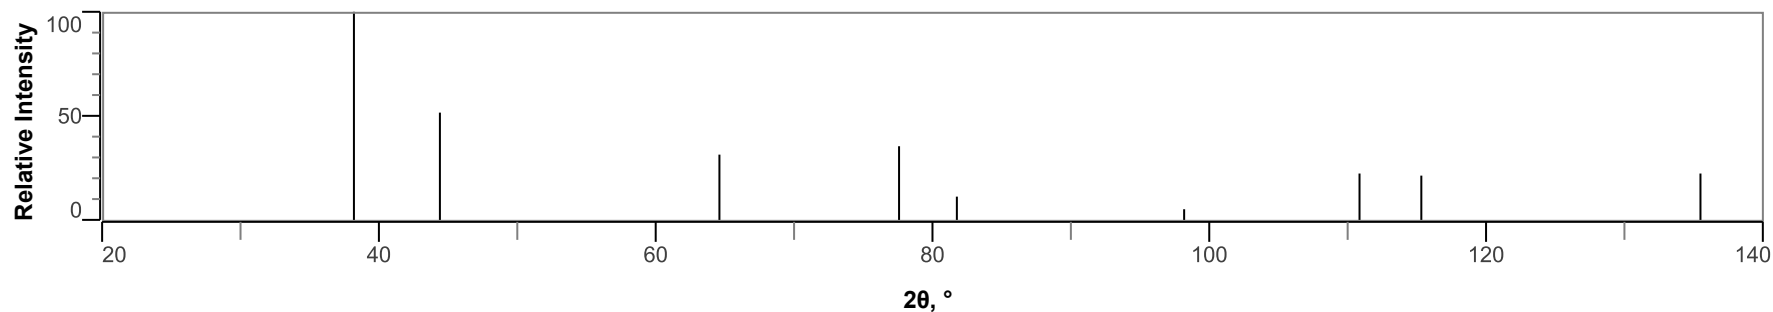

| No. | 2 $\theta$ , ° | d-value | Norm. I. | h k l | No. | 2 $\theta$ , ° | d-value | Norm. I. | h k l |
|-----|----------------|---------|----------|-------|-----|----------------|---------|----------|-------|
| 1   | 38.19          | 2.355   | 100.00   | 1 1 1 | 6   | 98.13          | 1.020   | 6.00     | 4 0 0 |
| 2   | 44.39          | 2.039   | 52.00    | 2 0 0 | 7   | 110.82         | 0.936   | 23.00    | 3 3 1 |
| 3   | 64.58          | 1.442   | 32.00    | 2 2 0 | 8   | 115.26         | 0.912   | 22.00    | 4 2 0 |
| 4   | 77.57          | 1.230   | 36.00    | 3 1 1 | 9   | 135.41         | 0.833   | 23.00    | 4 2 2 |
| 5   | 81.72          | 1.177   | 12.00    | 2 2 2 |     |                |         |          |       |

2 $\theta$  are calculated with wavelength=1.54059Å
