# Supplementary material for: Synthesis and surface functionalization of gold microtubes for SERS detection of dyes
Source: Royal Society of Chemistry journal article supplement (doi:10.1039/d6ra01224h), 2026-04-29
Supplement: d6ra01224h2.pdf [file d6ra01224h2.pdf]

## Supplementary Information

### Synthesis and Surface Functionalization of Gold Microtubes for SERS Detection of Dyes

Ainur B. Khairusheva<sup>1,2</sup>, Ilya V. Korolkov<sup>1,2\*</sup>

<sup>1</sup>The Institute of Nuclear Physics, 050032, Ibragimov str., 1, Almaty, Kazakhstan

<sup>2</sup>L.N.Gumilyov Eurasian National University, 010008, Satpaev str., 5, Astana, Kazakhstan

\*Corresponding author. e-mail –i.korolkov@inp.kz

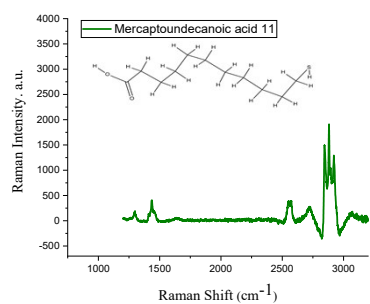

Figure S1. AuMUA11 after insufficient washing
